# Supplementary material for: Porous aluminophosphates as adsorbents for the separation of CO 2 /CH 4 and CH 4 /N 2 mixtures – a Monte Carlo simulation study
Source: Royal Society of Chemistry journal article supplement (doi:10.1039/c8se00173a), 2018-01-01
Supplement: c8se00173a1.xlsx [file c8se00173a1.xlsx]

## Sheet: CO2-CH4 equi
CO2/CH4 - equimolar mixture
	VSA - p_ads = 1 bar, p_des = 0.1 bar				PSA - p_ads = 6 bar, p_des = 1 bar				PSA - p_ads = 10 bar, p_des = 1 bar				VSA
	Deltan(CO2)	S(CO2/CH4)			Deltan(CO2)	S(CO2/CH4)			Deltan(CO2)	S(CO2/CH4)
ACO	0.878009	7.25902			1.60228	5.0698			2.00602	4.46091
AEI	1.27124	7.63348			2.72238	12.5622			3.28824	13.6473
AEL	0.55785	5.33622			0.517677	5.36533			0.61385	5.38137
AEN	0.86303	55.8165			1.0012	50.5699			1.18949	48.434
AET	0.242701	4.51819			1.13497	6.64137			1.52304	7.68329
AFI	0.320737	3.81863			1.15063	5.13247			1.5282	5.63146
AFN	0.979058	18.6854			1.29098	27.7043			1.55127	30.8532
AFO	0.600493	5.92829			0.481786	6.39142			0.543213	6.08138
AFR	0.70818	5.17938			2.41206	7.16542			3.08702	8.04789
AFS	0.710565	5.69732			2.82163	7.87854			3.62681	8.50549
AFT	1.20853	8.13115			2.43348	11.8274			3.04295	13.1688
AFV	1.15407	6.50919			1.90489	10.0726			2.37504	10.5596
AFX	1.21089	8.56898			2.33403	11.6944			2.99266	13.6749
AFY	1.43761	9.28635			3.67948	11.4199			4.41838	12.0147
APC	0.887819	61.1964			1.30663	46.7487			1.61403	40.9837
ATN	1.01479	25.6464			0.503922	32.6093			0.714716	35.486
ATO	0.4612	4.18349			0.484608	4.68897			0.572114	4.71527
ATS	0.78822	7.22663			1.53671	10.5155			1.87286	11.874
ATT	1.62015	24.9688			0.813757	31.2841			1.02293	36.1312
ATV	0.532512	2.18487			0.381867	1.33557			0.397824	1.08157
AVL	1.22761	7.36116			1.97778	11.2105			2.4624	12.4305			PSA, p_ads = 6 bar
AWW	1.12226	7.87063			1.57028	13.2218			1.94301	15.3517
BPH	0.832754	6.7619			3.00627	10.3577			3.79359	11.5344
CHA	1.18718	6.99817			2.48573	11.4997			3.09492	12.9323
DFT	0.583196	6.50799			0.726291	4.27615			0.870999	3.59392
ERI	0.893549	5.42078			1.52094	7.61534			1.97718	8.90939
EZT	0.679584	4.54226			1.13413	5.60758			1.39176	6.04127
FAU	0.231712	3.16886			1.64883	4.26071			2.81281	5.11599
GIS	2.59145	54.969			0.483418	53.005			0.551765	58.7842
GME	1.16762	10.5105			2.31811	12.6911			2.95816	14.364
IFO	0.225735	3.78868			1.14762	5.10963			1.68288	5.86183
JRY	1.23006	9.84852			0.769521	9.54578			0.929505	9.82904
JSN	0.92463	4.60303			0.775828	4.11693			1.0054	4.25215
KFI	1.47052	12.7902			2.90478	18.9931			3.42888	19.9469
LEV	1.14405	6.22094			1.8293	8.99537			2.29932	10.0651
LTA	0.5413	4.50076			2.7183	7.73647			3.74491	9.91104
MER	1.05528	14.8672			1.62406	18.6134			2.04391	17.9632
OSI	0.315667	3.88536			0.565658	4.76186			0.711787	4.99732
OWE	1.40211	10.9532			1.4073	19.179			1.76691	21.729
PHI	1.41233	12.5643			1.6353	10.9532			2.07619	11.31
PON	1.07849	10.3835			0.936658	11.6605			1.05191	10.7827
RHO	1.08764	5.21918			2.79171	7.00647			3.52323	7.90539
SAF	0.31994	4.20795			0.777752	5.46487			0.978199	5.96429			PSA, p_ads = 10 bar
SAO	0.414552	3.52948			2.14491	5.00845			3.14698	5.94011
SAS	0.819793	4.74863			1.68251	6.68146			2.10067	7.37793
SAT	0.720527	4.55118			1.11228	6.07945			1.39902	6.58333
SAV	1.2686	8.22031			2.79089	13.8924			3.43291	15.5344
SFO	0.693004	5.1617			2.44884	7.39187			3.15648	8.45475
SFW	1.1983	9.38622			2.38225	12.4784			3.00446	13.7048
SIV	2.04799	23.5191			1.04775	17.6778			1.25387	16.2227
SWY	0.891827	5.5332			1.57519	7.88787			2.03972	8.88513
VFI	0.119411	2.79213			0.775705	3.21328			1.49867	3.65068
ZON	0.936034	5.83213			0.802288	7.84574			0.957416	7.93595

## Sheet: CO2-CH4 15-85
CO2/CH4 - 15:85 mixture
	VSA - p_ads = 1 bar, p_des = 0.1 bar				PSA - p_ads = 6 bar, p_des = 1 bar				PSA - p_ads = 10 bar, p_des = 1 bar				VSA
	Deltan(CO2)	S(CO2/CH4)			Deltan(CO2)	S(CO2/CH4)			Deltan(CO2)	S(CO2/CH4)
ACO	0.323106	7.72369			0.864304	5.28648			1.15116	4.91222
AEI	0.381333	6.55285			1.39365	9.13751			1.96987	10.4452
AEL	0.224087	5.11587			0.320785	5.09233			0.388828	5.06006
AEN	0.351539	56.5547			0.946058	56.6258			1.16285	50.6425
AET	0.0680655	4.25253			0.364476	5.11776			0.588842	5.71689
AFI	0.0943325	3.64964			0.417057	4.47467			0.636639	4.94563
AFN	0.372233	15.6368			0.952801	21.7972			1.34097	26.1717
AFO	0.25216	5.68864			0.328785	5.82149			0.39054	5.76258
AFR	0.202657	4.71634			0.94802	5.63816			1.3896	6.02478
AFS	0.209606	5.47576			1.01033	6.21157			1.63204	6.96139
AFT	0.444051	8.06746			1.20854	9.34206			1.71201	10.4326
AFV	0.399543	5.73113			0.993196	8.19338			1.39932	9.42708
AFX	0.479546	8.74712			1.18081	9.79051			1.67857	10.7382
AFY	0.442053	9.21092			1.89626	9.67368			2.63376	10.1139
APC	0.352525	66.5315			1.04878	59.22			1.39669	53.8569
ATN	0.905447	23.4976			0.457132	24.9444			0.557111	25.7856
ATO	0.166838	3.84741			0.266612	4.1981			0.322262	4.1734
ATS	0.226224	6.00557			0.818683	7.93034			1.09878	8.59544
ATT	1.07125	21.647			0.91365	26.8879			1.07245	26.797
ATV	0.213355	2.22727			0.120291	1.2965			0.0979238	1.06234
AVL	0.472411	6.93207			1.03056	8.62294			1.46106	9.92163			PSA, p_ads = 6 bar
AWW	0.37678	6.23209			0.949065	10.215			1.35714	12.5818
BPH	0.244731	6.2509			1.11572	7.70797			1.74487	8.66561
CHA	0.376521	6.22992			1.22217	8.43664			1.7525	9.88191
DFT	0.235268	7.14088			0.465098	4.9875			0.560497	4.20307
ERI	0.294551	4.8062			0.752098	6.15522			1.03426	6.84925
EZT	0.220316	4.2025			0.55903	4.80543			0.751342	5.20993
FAU	0.0666975	3.07893			0.40832	3.45232			0.744634	3.78896
GIS	1.89	49.2571			1.34068	59.6486			1.42321	56.3247
GME	0.563297	12.4633			1.09845	11.0384			1.57127	11.518
IFO	0.0644844	3.61326			0.341289	4.2083			0.567856	4.65934
JRY	0.63045	10.3854			0.718747	9.97808			0.784307	9.01718
JSN	0.382274	4.486			0.471059	4.26288			0.551416	3.92105
KFI	0.496054	10.7834			1.6511	14.6681			2.3375	16.5716
LEV	0.401663	5.61581			0.989959	8.09017			1.34685	8.97504
LTA	0.154003	4.26437			0.826727	5.34119			1.31872	6.03319
MER	0.390273	12.6064			1.11083	16.6091			1.49259	16.3025
OSI	0.102506	3.65151			0.263595	4.35914			0.334501	4.35146
OWE	0.570617	8.2454			0.981695	12.5004			1.32967	15.1232
PHI	0.669044	13.0346			1.162	12.1901			1.51829	12.0802
PON	0.459893	10.111			0.75742	9.89176			0.949788	10.4743
RHO	0.343388	4.8567			1.14928	5.39294			1.64705	5.82872
SAF	0.0944513	3.8139			0.326412	4.4718			0.452088	4.72535			PSA, p_ads = 10 bar
SAO	0.118331	3.36191			0.627971	4.0054			1.04279	4.4807
SAS	0.267585	4.59086			0.769021	5.73185			1.065	6.26827
SAT	0.246275	4.17717			0.521359	4.88034			0.701039	5.35835
SAV	0.397947	7.35943			1.36697	9.62548			1.984	11.1596
SFO	0.196006	4.70704			0.923641	5.7051			1.39773	6.19296
SFW	0.508056	10.2748			1.1334	10.0399			1.63794	10.9472
SIV	1.16298	24.0758			1.29656	21.3479			1.55995	21.6906
SWY	0.317145	5.13623			0.750894	6.35357			1.07443	7.32311
VFI	0.0354616	2.76866			0.207917	2.95313			0.380202	3.08959
ZON	0.430714	5.83053			0.464907	6.35645			0.58194	6.76678

## Sheet: CH4-N2 85-15
CH4/N2 mixture - 85:15 mixture
	VSA - p_ads = 1 bar, p_des = 0.1 bar				PSA - p_ads = 6 bar, p_des = 1 bar				PSA - p_ads = 10 bar, p_des = 1 bar				VSA
	Deltan(CH4)	S(CH4/N2)			Deltan(CH4)	S(CH4/N2)			Deltan(CH4)	S(CH4/N2)
ACO	0.251081	3.34216			1.42031	3.58314			2.4041	3.79351
AEI	0.346987	2.56962			1.18614	2.64105			1.7313	2.70244
AEL	0.298421	3.56948			0.637583	3.79903			0.812671	3.91789
AEN	0.0411585	1.50401			0.207278	1.50802			0.344977	1.42676
AET	0.0903928	2.03891			0.425904	2.14359			0.674297	2.16569
AFI	0.147938	2.25258			0.578539	2.29091			0.868572	2.31233
AFN	0.169045	2.65511			0.504534	2.53882			0.713428	2.49723
AFO	0.315642	3.6737			0.614943	3.85545			0.772689	3.83363
AFR	0.246052	2.5628			1.10413	2.67031			1.72461	2.70929
AFS	0.219125	2.30296			1.02546	2.383			1.64665	2.46313
AFT	0.362958	2.68436			1.12297	2.67214			1.57791	2.65296
AFV	0.447277	2.95118			0.97878	2.83349			1.27972	2.74424
AFX	0.385995	2.78314			1.12192	2.71795			1.54283	2.65798
AFY	0.273086	2.27668			1.43553	2.45054			2.38164	2.54708
APC	0.0331972	1.30256			0.178349	1.31044			0.317346	1.33269
ATN	0.570546	3.38188			0.870698	3.54017			1.01931	3.3918
ATO	0.286547	3.58721			0.565563	3.67037			0.707906	3.74751
ATS	0.219657	2.37355			0.812486	2.52723			1.1664	2.55538
ATT	0.476744	3.51029			1.18416	3.59159			1.48334	3.57529
ATV	0.692827	6.63975			1.27315	6.96777			1.47818	6.67938
AVL	0.479825	3.10701			1.08032	2.9548			1.41812	2.89127			PSA, p_ads = 6 bar
AWW	0.401471	3.09764			0.757024	2.84597			0.996648	2.70683
BPH	0.224337	2.27338			0.942343	2.29231			1.4475	2.31583
CHA	0.365266	2.64353			1.13965	2.69043			1.58134	2.66086
DFT	0.215921	3.89443			0.932988	4.13426			1.47555	4.50908
ERI	0.382123	2.92802			0.969222	2.92649			1.28187	2.89348
EZT	0.320984	2.89588			0.909262	2.98753			1.2334	3.00905
FAU	0.121041	1.77786			0.647757	1.84			1.11377	1.87621
GIS	0.309853	2.71182			1.31109	2.81926			1.89616	2.86573
GME	0.333856	2.67462			1.09583	2.64399			1.56004	2.60992
IFO	0.10142	2.00148			0.46927	2.02795			0.761199	2.083
JRY	0.470682	3.69865			1.13251	3.88968			1.4629	3.86475
JSN	0.594223	4.3212			1.13488	4.40344			1.45964	4.32234
KFI	0.305253	2.49086			1.03269	2.52351			1.5004	2.49757
LEV	0.468577	3.04397			0.94349	2.89109			1.23331	2.77343
LTA	0.203965	2.18387			0.935109	2.27572			1.46667	2.33018
MER	0.214503	2.60445			0.779759	2.7275			1.09689	2.63138
OSI	0.172438	2.84691			0.445057	2.85742			0.592353	2.8157
OWE	0.52338	3.67221			0.961156	3.60992			1.23055	3.62962
PHI	0.372634	3.23721			1.31376	3.49312			1.83054	3.62445
PON	0.32088	3.22438			0.974075	3.40352			1.31395	3.42455
RHO	0.43061	3.06662			1.63838	3.01953			2.38418	2.99008
SAF	0.145495	2.54879			0.520134	2.73365			0.734347	2.75186			PSA, p_ads = 10 bar
SAO	0.199349	2.02696			0.908638	2.06939			1.44167	2.10236
SAS	0.349236	2.71975			0.99235	2.75992			1.35776	2.73836
SAT	0.372129	3.06003			0.870815	3.10125			1.12169	3.03165
SAV	0.33315	2.56848			1.11712	2.61674			1.61879	2.64972
SFO	0.240076	2.56567			1.06199	2.65736			1.66648	2.72077
SFW	0.345012	2.68692			1.10951	2.62765			1.56661	2.61995
SIV	0.360305	3.08704			1.36109	3.17276			1.93759	3.21976
SWY	0.407767	3.05001			0.947411	2.93583			1.25958	2.94966
VFI	0.0724703	1.67018			0.392218	1.70492			0.686695	1.72799
ZON	0.543036	3.9561			0.856146	4.01056			1.02946	3.95137

## Sheet: CO2-CH4 equi - S_sorbent
Sorbent selection parameter calculated according to Bae & Snurr:
Calculations for 50/50 CO2/CH4 mixture
	VSA - p_ads = 1 bar, p_des = 0.1 bar						PSA - p_ads = 6 bar, p_des = 1 bar						PSA - p_ads = 10 bar, p_des = 1 bar
			S(CO2/CH4)	S(CO2/CH4)					S(CO2/CH4)	S(CO2/CH4)					S(CO2/CH4)	S(CO2/CH4)
	Deltan(CO2)	Deltan(CH4)	at p_ads	at p_des	S_sorbent		Deltan(CO2)	Deltan(CH4)	at p_ads	at p_des	S_sorbent		Deltan(CO2)	Deltan(CH4)	at p_ads	at p_des	S_sorbent
ACO	0.878009	0.123913	7.25902	8.64307	43.1987		1.60228	0.376252	5.0698	7.25902	15.0787		2.00602	0.537147	4.46091	7.25902	10.2379
AEI	1.27124	0.161335	7.63348	6.04024	76.0136		2.72238	0.143637	12.5622	7.63348	391.826		3.28824	0.158872	13.6473	7.63348	504.993
AEL	0.55785	0.103041	5.33622	4.99343	30.8728		0.517677	0.0957998	5.36533	5.33622	29.151		0.61385	0.113009	5.38137	5.33622	29.4782
AEN	0.86303	0.0154799	55.8165	56.2067	3090.26		1.0012	0.0216705	50.5699	55.8165	2116.76		1.18949	0.0273095	48.434	55.8165	1830.56
AET	0.242701	0.0530904	4.51819	4.05366	23.0217		1.13497	0.151974	6.64137	4.51819	72.9063		1.52304	0.173849	7.68329	4.51819	114.465
AFI	0.320737	0.0830009	3.81863	3.45068	16.3296		1.15063	0.200305	5.13247	3.81863	39.6269		1.5282	0.241336	5.63146	3.81863	52.5887
AFN	0.979058	0.0496371	18.6854	14.2998	481.589		1.29098	0.0266115	27.7043	18.6854	1992.7		1.55127	0.0260658	30.8532	18.6854	3031.89
AFO	0.600493	0.0997337	5.92829	5.55581	38.0871		0.481786	0.0663556	6.39142	5.92829	50.0312		0.543213	0.0861886	6.08138	5.92829	39.3183
AFR	0.70818	0.134812	5.17938	4.57875	30.7768		2.41206	0.294673	7.16542	5.17938	81.1435		3.08702	0.329632	8.04789	5.17938	117.111
AFS	0.710565	0.123723	5.69732	5.30924	35.1124		2.82163	0.31984	7.87854	5.69732	96.1145		3.62681	0.380732	8.50549	5.69732	120.958
AFT	1.20853	0.149071	8.13115	8.27271	64.7918		2.43348	0.151234	11.8274	8.13115	276.824		3.04295	0.164341	13.1688	8.13115	394.904
AFV	1.15407	0.17066	6.50919	5.29085	54.1539		1.90489	0.116195	10.0726	6.50919	255.526		2.37504	0.145853	10.5596	6.50919	278.945
AFX	1.21089	0.143263	8.56898	9.19451	67.4997		2.33403	0.154151	11.6944	8.56898	241.649		2.99266	0.155368	13.6749	8.56898	420.357
AFY	1.43761	0.154339	9.28635	9.04537	88.8029		3.67948	0.289988	11.4199	9.28635	178.19		4.41838	0.328593	12.0147	9.28635	209.019
APC	0.887819	0.0148759	61.1964	71.9449	3106.65		1.30663	0.0331953	46.7487	61.1964	1405.69		1.61403	0.0477528	40.9837	61.1964	927.702
ATN	1.01479	0.0366489	25.6464	23.499	775.032		0.503922	0.000182365	32.6093	25.6464	114572		0.714716	0.000310113	35.486	25.6464	113163
ATO	0.4612	0.108195	4.18349	3.81952	19.5321		0.484608	0.0891499	4.68897	4.18349	28.5684		0.572114	0.106476	4.71527	4.18349	28.5565
ATS	0.78822	0.105777	7.22663	5.66494	68.6962		1.53671	0.108287	10.5155	7.22663	217.14		1.87286	0.11036	11.874	7.22663	331.095
ATT	1.62015	0.0610388	24.9688	21.7876	759.514		0.813757	0.00759236	31.2841	24.9688	4201.14		1.02293	0.000122261	36.1312	24.9688	437447
ATV	0.532512	0.264099	2.18487	3.10135	3.10358		0.381867	0.484752	1.33557	2.18487	0.643129		0.397824	0.68677	1.08157	2.18487	0.310145
AVL	1.22761	0.16362	7.36116	6.72628	60.4423		1.97778	0.107706	11.2105	7.36116	313.505		2.4624	0.116481	12.4305	7.36116	443.745
AWW	1.12226	0.13119	7.87063	5.24079	101.115		1.57028	0.0518629	13.2218	7.87063	672.497		1.94301	0.046012	15.3517	7.87063	1264.47
BPH	0.832754	0.121466	6.7619	6.01811	52.0882		3.00627	0.242747	10.3577	6.7619	196.487		3.79359	0.272287	11.5344	6.7619	274.121
CHA	1.18718	0.164956	6.99817	5.75327	61.2634		2.48573	0.141274	11.4997	6.99817	332.491		3.09492	0.151539	12.9323	6.99817	488.085
DFT	0.583196	0.091661	6.50799	7.47518	36.0498		0.726291	0.224882	4.27615	6.50799	9.07431		0.870999	0.327853	3.59392	6.50799	5.27264
ERI	0.893549	0.16044	5.42078	4.58918	35.661		1.52094	0.145225	7.61534	5.42078	112.044		1.97718	0.147874	8.90939	5.42078	195.79
EZT	0.679584	0.146831	4.54226	4.01248	23.7988		1.13413	0.169823	5.60758	4.54226	46.2324		1.39176	0.188023	6.04127	4.54226	59.4755
FAU	0.231712	0.0726982	3.16886	3.00114	10.6646		1.64883	0.366305	4.26071	3.16886	25.7865		2.81281	0.519095	5.11599	3.16886	44.7557
GIS	2.59145	0.0429716	54.969	43.394	4199.2		0.483418	0.0114466	53.005	54.969	2158.55		0.551765	0.0053114	58.7842	54.969	6530.53
GME	1.16762	0.117159	10.5105	13.3528	82.4512		2.31811	0.158671	12.6911	10.5105	223.877		2.95816	0.168492	14.364	10.5105	344.641
IFO	0.225735	0.0590853	3.78868	3.51167	15.6165		1.14762	0.207571	5.10963	3.78868	38.1		1.68288	0.263795	5.86183	3.78868	57.8583
JRY	1.23006	0.127397	9.84852	10.5924	88.4128		0.769521	0.0857033	9.54578	9.84852	83.0759		0.929505	0.0948853	9.82904	9.84852	96.0956
JSN	0.92463	0.199746	4.60303	4.49705	21.8096		0.775828	0.217817	4.11693	4.60303	13.1153		1.0054	0.256971	4.25215	4.60303	15.3684
KFI	1.47052	0.11084	12.7902	10.3009	210.693		2.90478	0.109806	18.9931	12.7902	746.112		3.42888	0.124515	19.9469	12.7902	856.652
LEV	1.14405	0.177257	6.22094	5.14976	48.5029		1.8293	0.136783	8.99537	6.22094	173.954		2.29932	0.146001	10.0651	6.22094	256.463
LTA	0.5413	0.11894	4.50076	4.06384	22.6854		2.7183	0.295891	7.73647	4.50076	122.17		3.74491	0.305453	9.91104	4.50076	267.577
MER	1.05528	0.0683947	14.8672	12.1754	280.103		1.62406	0.0706128	18.6134	14.8672	535.97		2.04391	0.0995334	17.9632	14.8672	445.688
OSI	0.315667	0.0800223	3.88536	3.52355	16.9006		0.565658	0.101642	4.76186	3.88536	32.4789		0.711787	0.121706	4.99732	3.88536	37.5907
OWE	1.40211	0.115308	10.9532	7.58645	192.295		1.4073	0.00619877	19.179	10.9532	7624.17		1.76691	0.00363975	21.729	10.9532	20925.8
PHI	1.41233	0.114599	12.5643	13.6895	142.118		1.6353	0.169755	10.9532	12.5643	91.9839		2.07619	0.198995	11.31	12.5643	106.22
PON	1.07849	0.102801	10.3835	9.88119	114.471		0.936658	0.0666573	11.6605	10.3835	184.004		1.05191	0.0929344	10.7827	10.3835	126.739
RHO	1.08764	0.2053	5.21918	4.67786	30.8498		2.79171	0.33847	7.00647	5.21918	77.5793		3.52323	0.365783	7.90539	5.21918	115.335
SAF	0.31994	0.0746449	4.20795	3.6391	20.8553		0.777752	0.12279	5.46487	4.20795	44.954		0.978199	0.139006	5.96429	4.20795	59.4893
SAO	0.414552	0.116425	3.52948	3.25888	13.6109		2.14491	0.389915	5.00845	3.52948	39.0963		3.14698	0.47709	5.94011	3.52948	65.9435
SAS	0.819793	0.169521	4.74863	4.18586	26.0515		1.68251	0.19517	6.68146	4.74863	81.0438		2.10067	0.214938	7.37793	4.74863	112.033
SAT	0.720527	0.154732	4.55118	3.98473	24.2058		1.11228	0.136821	6.07945	4.55118	66.0183		1.39902	0.155857	6.58333	4.55118	85.4801
SAV	1.2686	0.150808	8.22031	6.99927	81.2125		2.79089	0.129654	13.8924	8.22031	505.386		3.43291	0.138835	15.5344	8.22031	725.88
SFO	0.693004	0.132321	5.1617	4.5422	30.7203		2.44884	0.286494	7.39187	5.1617	90.4817		3.15648	0.31551	8.45475	5.1617	138.548
SFW	1.1983	0.131604	9.38622	10.9668	73.1474		2.38225	0.152503	12.4784	9.38622	259.14		3.00446	0.170388	13.7048	9.38622	352.842
SIV	2.04799	0.0872905	23.5191	23.7354	546.773		1.04775	0.0957622	17.6778	23.5191	145.378		1.25387	0.126963	16.2227	23.5191	110.51
SWY	0.891827	0.158546	5.5332	5.07143	33.9584		1.57519	0.142959	7.88787	5.5332	123.899		2.03972	0.157861	8.88513	5.5332	184.352
VFI	0.119411	0.0426633	2.79213	2.73117	7.98939		0.775705	0.235192	3.21328	2.79213	12.1965		1.49867	0.399369	3.65068	2.79213	17.912
ZON	0.936034	0.158217	5.83213	5.54092	36.3171		0.802288	0.0499349	7.84574	5.83213	169.577		0.957416	0.0665972	7.93595	5.83213	155.244

## Sheet: ACO
ACO
Equimolar CO2/CH4 mixture							15:85 CO2/CH4 mixture							15:85 N2/CH4 mixture
p_total / kPa	n_CO2 / mmol/g	qst_CO2 / kJ/mol	n_CH4 / mmol/g	qst_CH4 / kJ/mol	S_CO2/CH4		p_total / kPa	n_CO2 / mmol/g	qst_CO2 / kJ/mol	n_CH4 / mmol/g	qst_CH4 / kJ/mol	S_CO2/CH4		p_total / kPa	n_N2 / mmol/g	qst_N2 / kJ/mol	n_CH4 / mmol/g	qst_CH4 / kJ/mol	S_CH4/N2
10	0.134109	29.1295	0.0155164	20.8794	8.64307		10	0.0417182	29.1373	0.027154	20.8484	8.70602		10	0.00146208	16.0262	0.0272424	20.8208	3.28812
20	0.253773	29.1161	0.0311489	20.9761	8.14708		20	0.0798141	29.1061	0.0535384	20.8862	8.44777		20	0.00296902	16.0358	0.0539774	20.8513	3.20827
30	0.368083	29.1443	0.0461634	21.0449	7.97349		30	0.117375	29.1029	0.0815918	20.9424	8.15186		30	0.00443195	16.0495	0.0811607	20.8681	3.23164
40	0.469659	29.1382	0.0605042	21.1139	7.76241		40	0.15634	29.1633	0.108093	20.9782	8.19596		40	0.0059664	16.0739	0.109043	20.8844	3.2252
50	0.592126	29.2041	0.0751005	21.1932	7.88445		50	0.194626	29.1607	0.133347	21.0084	8.27075		50	0.00744095	16.0899	0.135386	20.9015	3.21084
60	0.668698	29.203	0.0893331	21.2529	7.48544		60	0.228963	29.2032	0.159873	21.0575	8.11554		60	0.00888515	16.0914	0.165045	20.9312	3.278
70	0.778274	29.2408	0.0994466	21.3119	7.82605		70	0.266591	29.1927	0.183306	21.0935	8.24132		70	0.0104482	16.1264	0.192837	20.9476	3.25705
80	0.833935	29.1982	0.114726	21.3542	7.26892		80	0.296274	29.2036	0.210569	21.1294	7.97308		80	0.0117893	16.1401	0.21944	20.9762	3.28473
90	0.925188	29.2257	0.126161	21.4227	7.33337		90	0.331535	29.2228	0.237988	21.1637	7.89407		90	0.0132475	16.1431	0.246817	21.0072	3.28785
100	1.01212	29.2581	0.139429	21.4752	7.25902		100	0.364824	29.2368	0.267662	21.2123	7.72369		100	0.0146959	16.1639	0.278323	21.0286	3.34216
200	1.59523	29.3493	0.247437	21.9022	6.44702		200	0.642683	29.3148	0.503436	21.5168	7.23403		200	0.0292588	16.323	0.55566	21.2186	3.35139
400	2.23394	29.4695	0.392949	22.3753	5.68506		400	1.03536	29.4916	0.918113	22.0212	6.39035		400	0.0578085	16.6535	1.14126	21.6395	3.48389
600	2.6144	29.5756	0.515681	22.7159	5.0698		600	1.22913	29.5519	1.31752	22.4185	5.28648		600	0.0836579	16.9376	1.69863	21.9935	3.58314
800	2.85949	29.6424	0.597778	22.9	4.78352		800	1.43101	29.6041	1.52052	22.6459	5.33307		800	0.10791	17.1909	2.19663	22.3109	3.59224
1000	3.01814	29.6864	0.676576	23.0665	4.46091		1000	1.51598	29.6398	1.74882	22.8265	4.91222		1000	0.124784	17.428	2.68242	22.6097	3.79351

## Sheet: AEI
AEI
Equimolar CO2/CH4 mixture							15:85 CO2/CH4 mixture							15:85 N2/CH4 mixture
p_total / kPa	n_CO2 / mmol/g	qst_CO2 / kJ/mol	n_CH4 / mmol/g	qst_CH4 / kJ/mol	S_CO2/CH4		p_total / kPa	n_CO2 / mmol/g	qst_CO2 / kJ/mol	n_CH4 / mmol/g	qst_CH4 / kJ/mol	S_CO2/CH4		p_total / kPa	n_N2 / mmol/g	qst_N2 / kJ/mol	n_CH4 / mmol/g	qst_CH4 / kJ/mol	S_CH4/N2
10	0.150497	23.3692	0.0249157	16.2508	6.04024		10	0.0450675	23.1845	0.0431447	16.1632	5.91921		10	0.00296214	13.3342	0.0433938	16.1346	2.5852
20	0.299072	23.6649	0.0486786	16.4185	6.14382		20	0.0893254	23.2961	0.0848028	16.2405	5.96888		20	0.00587156	13.3768	0.0854172	16.1553	2.56723
30	0.45046	23.989	0.0705996	16.5669	6.38049		30	0.134478	23.4675	0.125	16.3127	6.09633		30	0.00871169	13.3934	0.126969	16.1871	2.57198
40	0.594454	24.2574	0.0915991	16.7255	6.48974		40	0.176277	23.5706	0.162888	16.3798	6.13246		40	0.0115065	13.4182	0.166671	16.2143	2.55616
50	0.742298	24.5376	0.111409	16.8895	6.66281		50	0.21907	23.6953	0.201617	16.4548	6.1572		50	0.014131	13.4433	0.206847	16.2501	2.58315
60	0.894865	24.8832	0.127928	17.0301	6.99506		60	0.260568	23.7846	0.237797	16.5282	6.2093		60	0.016804	13.4564	0.245173	16.2845	2.57473
70	1.0286	25.0775	0.145088	17.1679	7.08949		70	0.302708	23.9215	0.271906	16.5906	6.30859		70	0.0193098	13.4821	0.285306	16.3187	2.60738
80	1.16574	25.3642	0.161052	17.293	7.23826		80	0.3469	24.0948	0.304669	16.6595	6.45214		80	0.0218138	13.5082	0.320667	16.3526	2.59415
90	1.29702	25.583	0.173169	17.437	7.48994		90	0.389986	24.195	0.338004	16.725	6.53815		90	0.024208	13.5286	0.356662	16.3711	2.59998
100	1.42174	25.8155	0.186251	17.5468	7.63348		100	0.426401	24.3026	0.368736	16.7884	6.55285		100	0.0268097	13.5396	0.390381	16.4024	2.56962
200	2.47846	27.6785	0.266451	18.5677	9.30176		200	0.801453	25.3055	0.63343	17.3625	7.16981		200	0.0480446	13.7423	0.706444	16.6714	2.59481
400	3.59318	29.5422	0.312999	19.6696	11.4798		400	1.38684	26.6794	0.9549	18.1827	8.2299		400	0.0805651	14.0493	1.20207	17.118	2.63302
600	4.14412	30.4802	0.329887	20.2178	12.5622		600	1.82005	27.6273	1.12871	18.7407	9.13751		600	0.105341	14.2937	1.57652	17.464	2.64105
800	4.50649	31.0655	0.333488	20.574	13.5132		800	2.1382	28.2597	1.23154	19.132	9.83846		800	0.123711	14.5028	1.87692	17.7566	2.67738
1000	4.70998	31.4513	0.345122	20.7993	13.6473		1000	2.39627	28.7847	1.30001	19.4287	10.4452		1000	0.138547	14.6636	2.12168	17.9805	2.70244

## Sheet: AEL
AEL
Equimolar CO2/CH4 mixture							15:85 CO2/CH4 mixture							15:85 N2/CH4 mixture
p_total / kPa	n_CO2 / mmol/g	qst_CO2 / kJ/mol	n_CH4 / mmol/g	qst_CH4 / kJ/mol	S_CO2/CH4		p_total / kPa	n_CO2 / mmol/g	qst_CO2 / kJ/mol	n_CH4 / mmol/g	qst_CH4 / kJ/mol	S_CO2/CH4		p_total / kPa	n_N2 / mmol/g	qst_N2 / kJ/mol	n_CH4 / mmol/g	qst_CH4 / kJ/mol	S_CH4/N2
10	0.11656	25.3838	0.0233427	19.7507	4.99343		10	0.0361367	25.2199	0.04117	19.6589	4.97388		10	0.00212042	15.9177	0.0420961	19.6277	3.50341
20	0.21783	25.6668	0.0427352	19.8971	5.09722		20	0.0692965	25.3446	0.0780031	19.7503	5.03416		20	0.00409175	15.9242	0.0820273	19.6736	3.53771
30	0.303066	25.8842	0.0594248	20.033	5.09998		30	0.100098	25.468	0.113743	19.8319	4.98685		30	0.0059448	15.9676	0.120212	19.7169	3.56849
40	0.379464	26.0629	0.0736138	20.143	5.1548		40	0.127758	25.5649	0.14602	19.9086	4.95794		40	0.00774139	15.9869	0.155529	19.7537	3.54539
50	0.442987	26.2391	0.0861117	20.2469	5.14433		50	0.153254	25.6607	0.174278	19.9683	4.98307		50	0.00941589	16.0282	0.190055	19.8034	3.56197
60	0.505623	26.4084	0.0963888	20.3257	5.24567		60	0.177192	25.7493	0.199489	20.0296	5.0333		60	0.0110111	16.0439	0.223945	19.8353	3.58908
70	0.559847	26.5745	0.104294	20.4127	5.36797		70	0.200046	25.8481	0.22582	20.0938	5.0199		70	0.0126434	16.0627	0.255155	19.8785	3.56135
80	0.597939	26.6616	0.114051	20.4906	5.24275		80	0.222144	25.9477	0.249125	20.1475	5.05295		80	0.0139901	16.0883	0.286584	19.9129	3.61496
90	0.635522	26.7567	0.121259	20.5687	5.24103		90	0.238541	26.0101	0.272471	20.201	4.96102		90	0.0152791	16.1169	0.314002	19.9368	3.62667
100	0.67441	26.8682	0.126384	20.6039	5.33622		100	0.260224	26.0962	0.288241	20.2455	5.11587		100	0.0168347	16.1394	0.340517	19.9789	3.56948
200	0.911925	27.6034	0.168337	21.0468	5.41727		200	0.389008	26.6097	0.429104	20.6057	5.13717		200	0.0266879	16.3085	0.56157	20.2528	3.71332
400	1.11206	28.2343	0.197716	21.4487	5.62454		400	0.511644	27.2027	0.572848	20.983	5.06124		400	0.0390809	16.538	0.822088	20.5792	3.71216
600	1.19209	28.5413	0.222183	21.6506	5.36533		600	0.581008	27.5197	0.646538	21.2219	5.09233		600	0.0454341	16.6776	0.9781	20.7949	3.79903
800	1.25516	28.7703	0.230921	21.8153	5.43544		800	0.630015	27.7567	0.684277	21.3545	5.2173		800	0.0502495	16.7574	1.07506	20.9234	3.7755
1000	1.28826	28.8892	0.239393	21.8815	5.38137		1000	0.649052	27.9239	0.726861	21.4448	5.06006		1000	0.0519422	16.8098	1.15319	21.0379	3.91789

## Sheet: AEN
AEN
Equimolar CO2/CH4 mixture							15:85 CO2/CH4 mixture							15:85 N2/CH4 mixture
p_total / kPa	n_CO2 / mmol/g	qst_CO2 / kJ/mol	n_CH4 / mmol/g	qst_CH4 / kJ/mol	S_CO2/CH4		p_total / kPa	n_CO2 / mmol/g	qst_CO2 / kJ/mol	n_CH4 / mmol/g	qst_CH4 / kJ/mol	S_CO2/CH4		p_total / kPa	n_N2 / mmol/g	qst_N2 / kJ/mol	n_CH4 / mmol/g	qst_CH4 / kJ/mol	S_CH4/N2
10	0.144211	33.1837	0.00256573	20.8317	56.2067		10	0.044856	33.1547	0.00454203	20.7853	55.9626		10	0.00053879	17.4356	0.00463709	20.7162	1.51879
20	0.28297	33.3171	0.00503272	20.9314	56.226		20	0.0890267	33.2174	0.00874897	20.7858	57.6622		20	0.00108081	17.4161	0.00915721	20.7516	1.49516
30	0.399223	33.395	0.00695211	21.0456	57.4247		30	0.130302	33.1849	0.0129115	20.8282	57.188		30	0.00163196	17.4381	0.0138851	20.7432	1.50145
40	0.519225	33.6104	0.00906512	21.1407	57.2772		40	0.174313	33.2564	0.017723	20.8709	55.7339		40	0.00211833	17.4239	0.0181189	20.723	1.50942
50	0.614535	33.6627	0.0112143	21.2532	54.7991		50	0.212346	33.2702	0.021214	20.8959	56.7218		50	0.00267845	17.4352	0.0226311	20.755	1.49106
60	0.724631	33.929	0.0122079	21.2801	59.3577		60	0.248529	33.261	0.0253551	20.9139	55.5443		60	0.00327136	17.4602	0.0266527	20.7277	1.43776
70	0.780822	33.8967	0.0143447	21.342	54.4327		70	0.295611	33.412	0.0294719	20.9908	56.8381		70	0.00374761	17.4199	0.0324805	20.7567	1.52947
80	0.85424	34.0131	0.015719	21.4099	54.3445		80	0.323908	33.324	0.0328973	21.016	55.7942		80	0.00431244	17.4558	0.0361092	20.7399	1.47763
90	0.937132	34.0578	0.0170343	21.4985	55.0144		90	0.35766	33.432	0.0365365	21.0226	55.4716		90	0.00480813	17.4397	0.0410625	20.7647	1.5071
100	1.00724	34.1763	0.0180456	21.5475	55.8165		100	0.396395	33.4727	0.0397179	21.075	56.5547		100	0.00537336	17.4478	0.0457956	20.7536	1.50401
200	1.4189	34.6931	0.0269415	21.9397	52.6659		200	0.683557	33.8363	0.0706946	21.3095	54.7919		200	0.0107859	17.4823	0.0889268	20.7945	1.45495
400	1.76897	35.0861	0.0373127	22.2831	47.4094		400	1.06473	34.1967	0.115425	21.6582	52.2715		400	0.0208404	17.5331	0.171709	20.8321	1.45399
600	2.00844	35.6087	0.0397161	22.4822	50.5699		600	1.34245	34.7391	0.134342	21.9037	56.6258		600	0.0296151	17.5682	0.253074	20.8853	1.50802
800	2.12862	35.8724	0.0438361	22.6262	48.5586		800	1.44617	34.6784	0.157971	22.0108	51.8764		800	0.0391375	17.6272	0.326005	20.9431	1.46995
1000	2.19673	36.1636	0.0453551	22.7695	48.434		1000	1.55924	34.8366	0.174472	22.1712	50.6425		1000	0.0483331	17.6754	0.390772	20.9674	1.42676

## Sheet: AET
AET
Equimolar CO2/CH4 mixture							15:85 CO2/CH4 mixture							15:85 N2/CH4 mixture
p_total / kPa	n_CO2 / mmol/g	qst_CO2 / kJ/mol	n_CH4 / mmol/g	qst_CH4 / kJ/mol	S_CO2/CH4		p_total / kPa	n_CO2 / mmol/g	qst_CO2 / kJ/mol	n_CH4 / mmol/g	qst_CH4 / kJ/mol	S_CO2/CH4		p_total / kPa	n_N2 / mmol/g	qst_N2 / kJ/mol	n_CH4 / mmol/g	qst_CH4 / kJ/mol	S_CH4/N2
10	0.0246868	18.6756	0.00609	13.2923	4.05366		10	0.00734834	18.6272	0.0102826	13.266	4.04961		10	0.000893989	11.0154	0.0103206	13.2405	2.03725
20	0.0496892	18.7996	0.0120769	13.3672	4.11441		20	0.0148526	18.6965	0.0206428	13.3058	4.07721		20	0.00178193	11.0686	0.0205315	13.2622	2.03331
30	0.0743358	18.9065	0.0182559	13.4528	4.07188		30	0.0221437	18.7363	0.0307908	13.3374	4.07526		30	0.00267165	11.0694	0.0307384	13.2976	2.03037
40	0.10126	19.0568	0.0241261	13.5278	4.19713		40	0.0297601	18.8067	0.0409839	13.3817	4.11481		40	0.00352248	11.077	0.0409404	13.3149	2.05105
50	0.127401	19.1749	0.0299495	13.5964	4.25386		50	0.0368792	18.8563	0.0508546	13.4166	4.10941		50	0.0044382	11.0951	0.0513917	13.3395	2.04342
60	0.155347	19.3368	0.0358368	13.6845	4.33483		60	0.044563	18.9138	0.0613724	13.4619	4.11461		60	0.00526942	11.106	0.0612099	13.3557	2.04989
70	0.182967	19.433	0.0421098	13.7846	4.345		70	0.0525467	18.9892	0.0715547	13.5164	4.16136		70	0.00613339	11.1239	0.0712259	13.381	2.04932
80	0.210224	19.6007	0.0476106	13.8398	4.41549		80	0.0602025	19.067	0.0814723	13.5475	4.18729		80	0.00699426	11.1452	0.0813419	13.4019	2.05232
90	0.237649	19.7227	0.0530732	13.9227	4.47776		90	0.0674214	19.1001	0.0917635	13.59	4.16347		90	0.00787704	11.1664	0.0912742	13.4264	2.04483
100	0.267388	19.8834	0.0591804	14.0074	4.51819		100	0.0754138	19.1802	0.100492	13.6134	4.25253		100	0.00871687	11.1754	0.100713	13.4432	2.03891
200	0.549962	21.1737	0.11008	14.7877	4.99603		200	0.151538	19.7421	0.194512	14.0009	4.41471		200	0.0167646	11.3223	0.196875	13.6686	2.07238
400	1.04671	23.2131	0.17992	16.0683	5.81764		400	0.304295	20.8033	0.356119	14.693	4.84203		400	0.0311379	11.6054	0.370338	14.0264	2.09885
600	1.40236	24.6204	0.211155	16.9989	6.64137		600	0.43989	21.6697	0.487071	15.2743	5.11776		600	0.0433538	11.857	0.526618	14.373	2.14359
800	1.61961	25.4759	0.225824	17.5708	7.17203		800	0.565274	22.42	0.582045	15.7673	5.50339		800	0.0538111	12.0728	0.66202	14.6641	2.17106
1000	1.79043	26.1914	0.233029	17.9739	7.68329		1000	0.664256	23.0031	0.658421	16.1596	5.71689		1000	0.0631515	12.2415	0.775011	14.9017	2.16569

## Sheet: AFI
AFI
Equimolar CO2/CH4 mixture							15:85 CO2/CH4 mixture							15:85 N2/CH4 mixture
p_total / kPa	n_CO2 / mmol/g	qst_CO2 / kJ/mol	n_CH4 / mmol/g	qst_CH4 / kJ/mol	S_CO2/CH4		p_total / kPa	n_CO2 / mmol/g	qst_CO2 / kJ/mol	n_CH4 / mmol/g	qst_CH4 / kJ/mol	S_CO2/CH4		p_total / kPa	n_N2 / mmol/g	qst_N2 / kJ/mol	n_CH4 / mmol/g	qst_CH4 / kJ/mol	S_CH4/N2
10	0.0355117	18.3607	0.0102912	14.1604	3.45068		10	0.0105612	18.2945	0.0174729	14.1146	3.42512		10	0.00138814	11.7237	0.0175392	14.1026	2.22971
20	0.0711302	18.5256	0.0204117	14.2668	3.48477		20	0.0212263	18.3757	0.0347864	14.1713	3.45774		20	0.00275775	11.7454	0.0349493	14.136	2.23643
30	0.107057	18.6807	0.0303447	14.3522	3.52804		30	0.0317063	18.453	0.051989	14.2229	3.4559		30	0.00410224	11.7667	0.0518825	14.1559	2.23189
40	0.143343	18.831	0.040216	14.4517	3.56433		40	0.0420363	18.5298	0.0686341	14.2686	3.47067		40	0.00543192	11.8044	0.0689886	14.1867	2.24128
50	0.178812	18.9826	0.0495716	14.5341	3.60715		50	0.0528369	18.6146	0.0847465	14.3123	3.533		50	0.00671399	11.7959	0.0856477	14.2096	2.25117
60	0.214522	19.1162	0.0588847	14.605	3.64308		60	0.0630169	18.6808	0.101323	14.3616	3.52433		60	0.00800919	11.8022	0.10205	14.2309	2.24853
70	0.250118	19.2659	0.0681228	14.7085	3.67158		70	0.0738066	18.7615	0.117611	14.4171	3.55612		70	0.00930381	11.8366	0.118723	14.2567	2.25189
80	0.286324	19.4261	0.0769666	14.7862	3.72011		80	0.0840316	18.8366	0.132784	14.4435	3.58611		80	0.0104743	11.8457	0.134414	14.2901	2.2646
90	0.322884	19.5388	0.0852172	14.8797	3.78895		90	0.0944447	18.8997	0.148746	14.4969	3.59798		90	0.0117131	11.8727	0.150122	14.3113	2.26175
100	0.356248	19.6899	0.0932922	14.9558	3.81863		100	0.104894	18.9802	0.162865	14.5454	3.64964		100	0.0129637	11.8872	0.165477	14.3412	2.25258
200	0.681757	20.8987	0.164617	15.7031	4.14147		200	0.203637	19.6148	0.301509	14.9472	3.82723		200	0.0243133	12.0712	0.31165	14.5694	2.26202
400	1.18841	22.6693	0.248193	16.793	4.78826		400	0.377758	20.6823	0.513715	15.6284	4.16695		400	0.0430021	12.3523	0.552498	14.9661	2.26732
600	1.50688	23.6507	0.293597	17.5071	5.13247		600	0.521951	21.47	0.660993	16.1526	4.47467		600	0.0573122	12.5873	0.744016	15.2799	2.29091
800	1.71021	24.368	0.323973	17.9378	5.27885		800	0.638862	22.0741	0.773255	16.5525	4.68179		800	0.06924	12.7793	0.901779	15.5466	2.29835
1000	1.88445	24.9096	0.334628	18.3135	5.63146		1000	0.741532	22.5494	0.849642	16.8801	4.94563		1000	0.0789159	12.9521	1.03405	15.7698	2.31233

[truncated: 48 more sheets: AFN, AFO, AFR, AFS, AFV, AFT, AFX, AFY, APC, ATN, ATO, ATS, ATT, ATV, AVL, AWW, BPH, CHA, DFT, ERI …]
